# Supplementary material for: Anisotropy in the mechanical properties of organic crystals: temperature dependence
Source: Royal Society of Chemistry journal article supplement (doi:10.1039/c5ra11656b), 2015-01-01

## **Supporting Information**

### **Anisotropy in the mechanical properties of organic crystals: temperature dependence**

Reda M. Mohamed, Manish Kumar Mishra, Laila M. AL-Harbi, Mohammed S. Al-Ghamdi,  
and Upadrasta Ramamurty\*

**Figure S1.** Representative load,  $P$ , vs. depth of penetration,  $h$ , curves obtained on various faces of saccharin and L-alanine at low and high temperatures

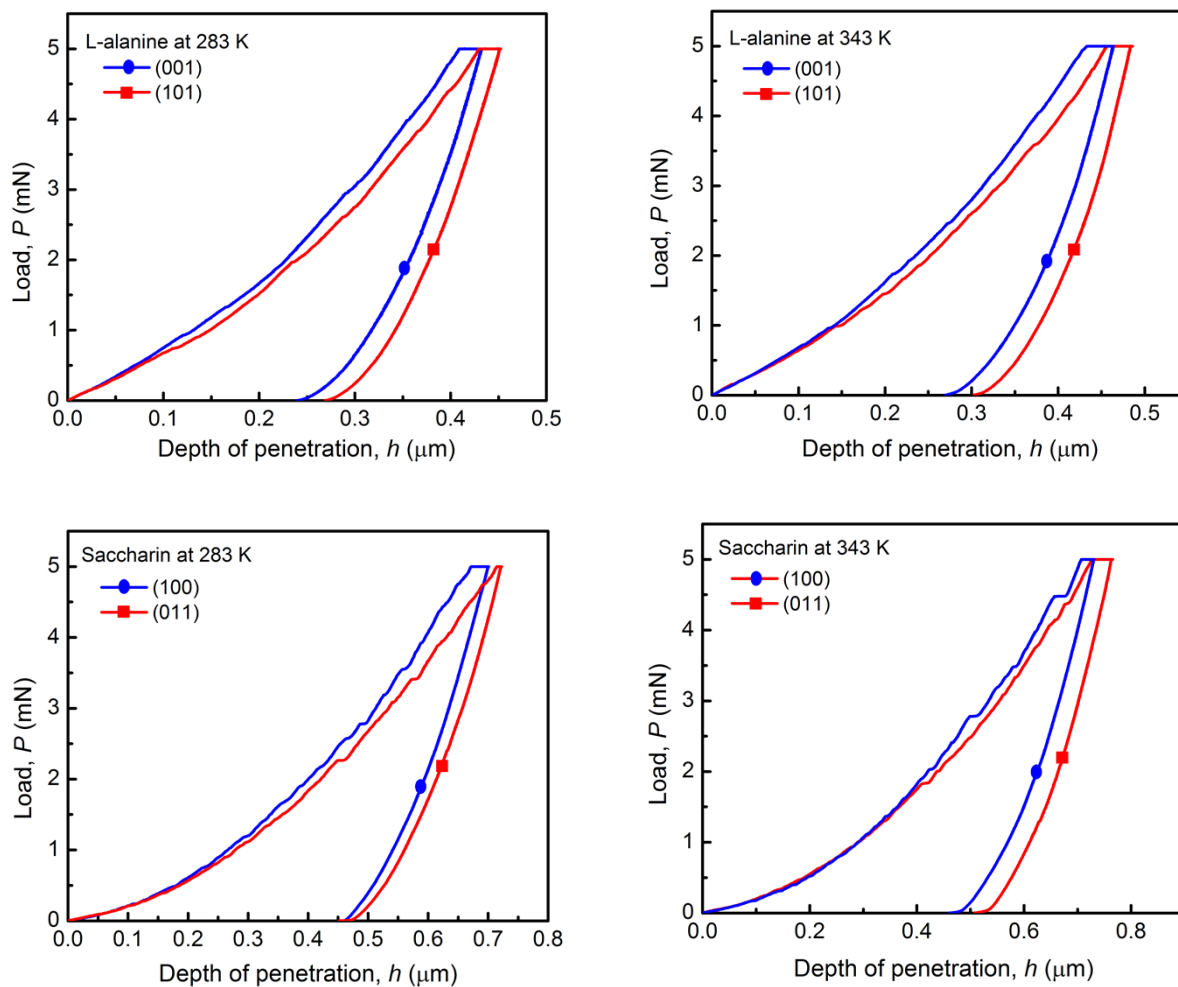

**Figure S2.** Variations of the elastic modulus,  $E$  with temperature

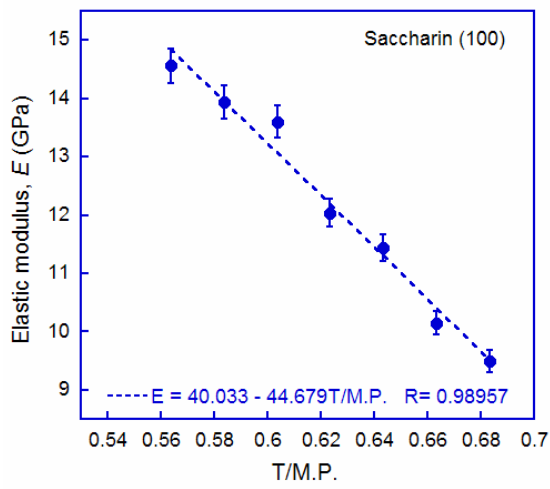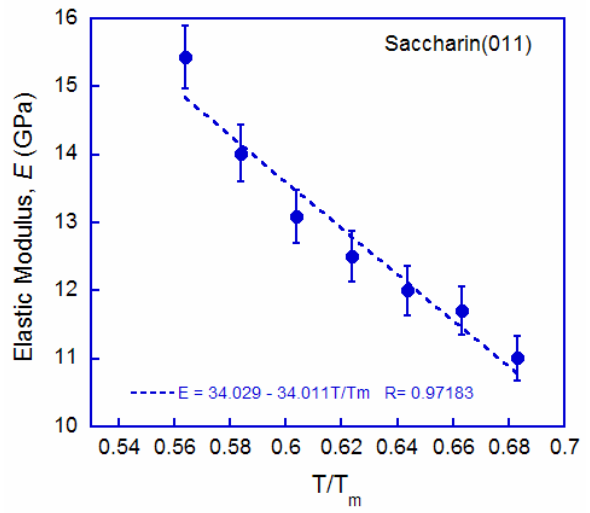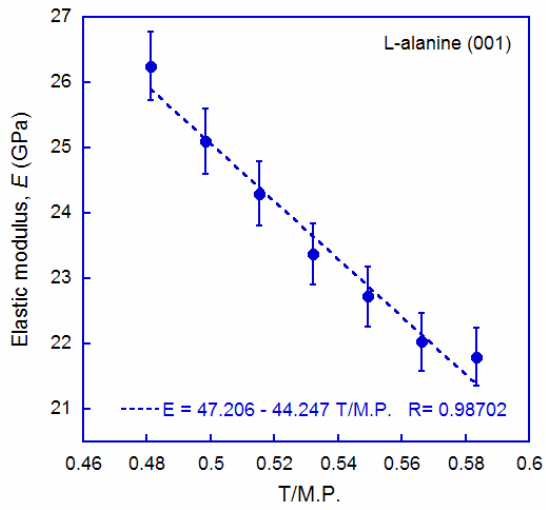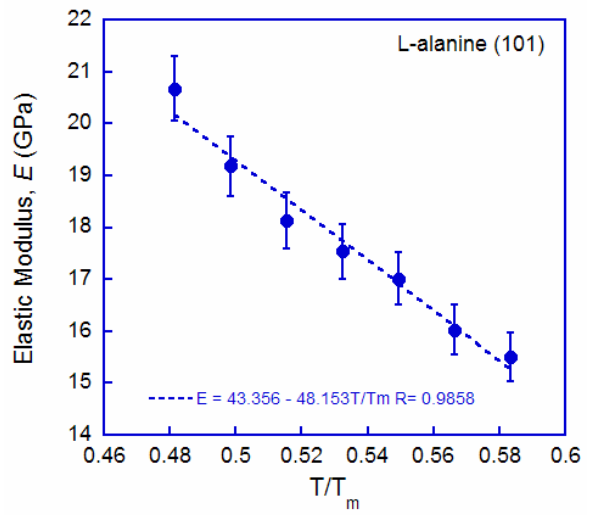

**Figure S3.** Variations in both  $E$  and  $H$  obtained on various faces at different temperature

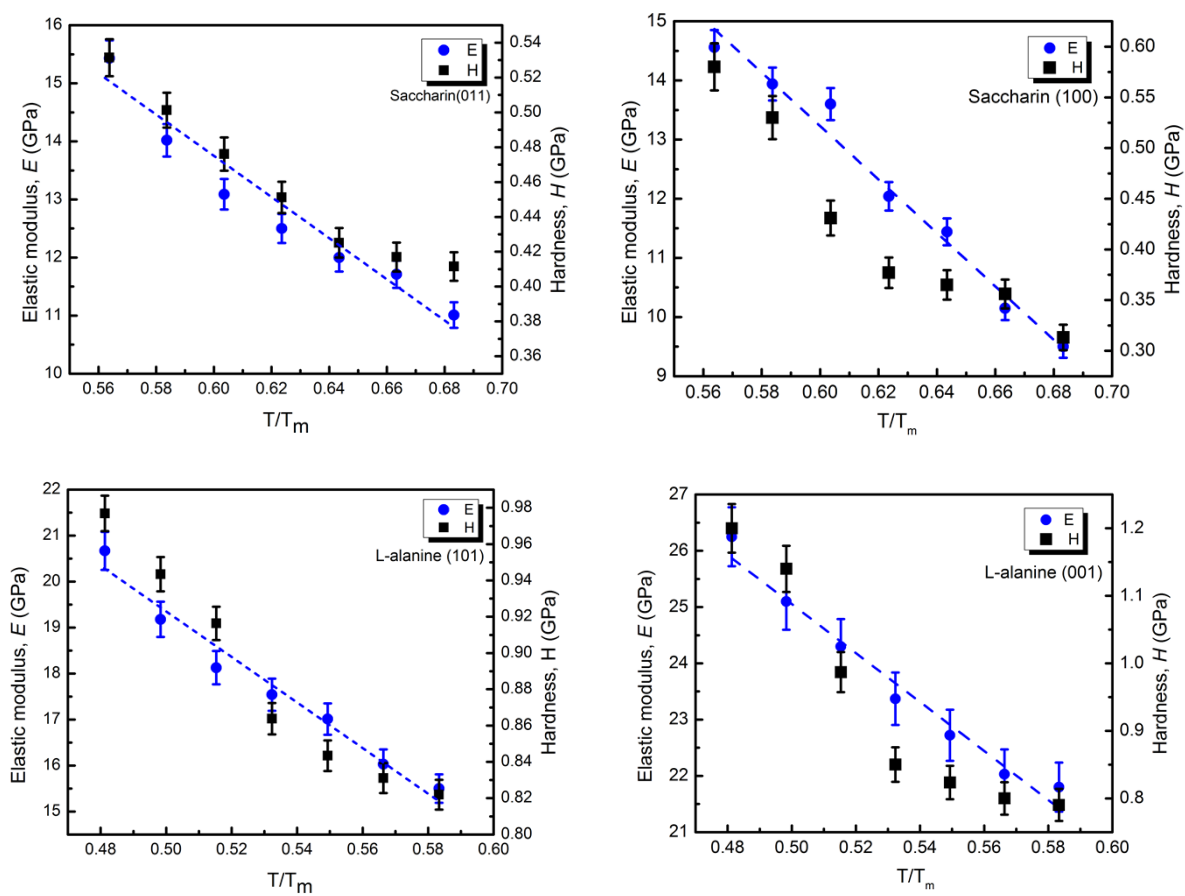

**Figure S4.** Lattice parameter as a function of temperature. Linear fits through the data are utilized to estimate the thermal expansion coefficients.

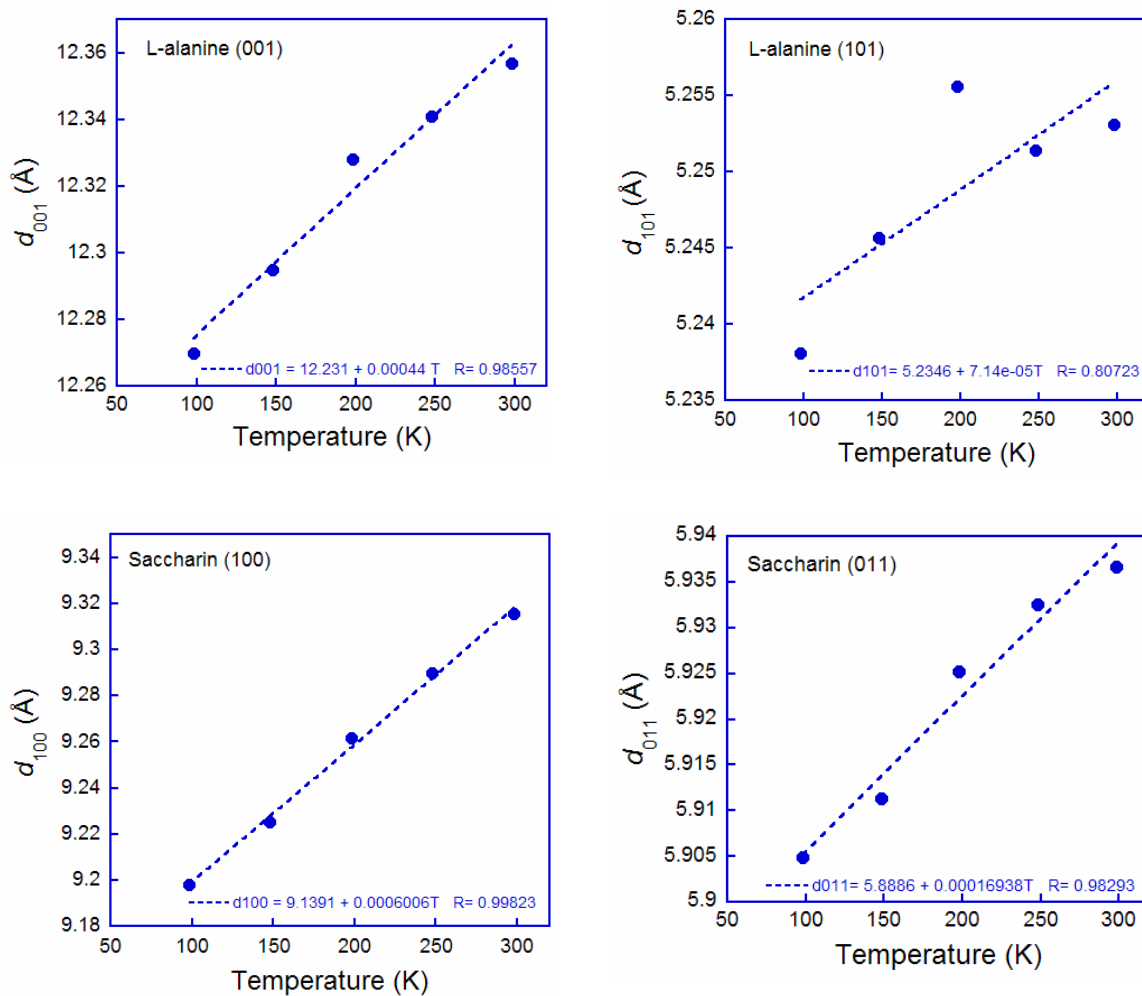

Supplement: c5ra11656b1.pdf [file c5ra11656b1.pdf]
